# Supplementary material for: Clonality of Fluconazole-Nonsusceptible Candida tropicalis in Bloodstream Infections, Taiwan, 2011–2017
Source: PubMed Central journal article supplement (PMC6711239; doi:10.3201/eid2509.190520), 2019-09
Supplement: 19-0520-Techapp-s1.pdf [file 19-0520-Techapp-s1.pdf]

# Clonality of Fluconazole-Nonsusceptible *Candida tropicalis* in Bloodstream Infections, Taiwan, 2011–2017

## Appendix

**Appendix Table 1.** Distribution of 24 clonal complexes and 9 singletons with corresponding diploid sequence types and fluconazole susceptibility test results among 165 *C. tropicalis* blood isolates, Taiwan, 2011–2017\*

| Clonal complex† | DST, no. (n = 87) | Isolates, no. (%) (n = 165) | Diploid sequence type                                                                                                                                                      | Fluconazole               |                           | Nonsusceptible, no. (%) |
|-----------------|-------------------|-----------------------------|----------------------------------------------------------------------------------------------------------------------------------------------------------------------------|---------------------------|---------------------------|-------------------------|
|                 |                   |                             |                                                                                                                                                                            | MIC <sub>50</sub> (µg/mL) | MIC <sub>90</sub> (µg/mL) |                         |
| 3               | 12                | 40 (24.2)                   | <b>507</b> (10), <b>225</b> (9), <b>376</b> (6), <b>506</b> (6), 333 (2), <b>375</b> (1), 379 (1), <b>505</b> (1), <b>753</b> (1), <b>754</b> (1), <b>838</b> (1), 847 (1) | 256                       | 512                       | 36 (90.0)               |
| 2               | 13                | 33 (20.0)                   | 140 (14), <b>98</b> (5), 144 (3), 357 (2), <b>45</b> (1), 168 (1), 388 (1), 389 (1), 820 (1), 829 (1), 830 (1), <b>858</b> (1), 859 (1)                                    | 2                         | 2                         | 3 (9.1)                 |
| 4               | 12                | 22 (13.3)                   | 139 (7), 171 (2), 184 (2), 823 (2), 833 (2), 257 (1), 386 (1), 558 (1), <b>757</b> (1), 825 (1), 832 (1), 834 (1)                                                          | 1                         | 2                         | 1 (4.6)                 |
| Singleton       | 9                 | 10 (6.1)                    | 826 (2), <b>387</b> (1), <b>758</b> (1), 822 (1), 824 (1), 827 (1), 828 (1), 836 (1), 837 (1)                                                                              | 1                         | 2                         | 2 (20.0)                |
| 1               | 7                 | 10 (6.1)                    | 384 (3), 134 (2), 90 (1), 203 (1), 377 (1), 563 (1), 821 (1)                                                                                                               | 1                         | 2                         | 0                       |
| 22              | 4                 | 9 (5.5)                     | <b>183</b> (6), 361 (1), 517 (1), 831 (1)                                                                                                                                  | 1                         | 2                         | 1 (11.1)                |
| 9               | 1                 | 4 (2.4)                     | 169 (4)                                                                                                                                                                    | 1                         | 2                         | 0                       |
| 11              | 2                 | 4 (2.4)                     | <b>508</b> (3), <b>752</b> (1)                                                                                                                                             | 16                        | 32                        | 4 (100)                 |
| 36              | 4                 | 4 (2.4)                     | 364 (1), 365 (1), 366 (1), 367 (1)                                                                                                                                         | 0.25                      | 1                         | 0                       |
| 8               | 2                 | 3 (1.8)                     | 359 (2), 549 (1)                                                                                                                                                           | 1                         | 2                         | 0                       |
| 20              | 3                 | 3 (1.8)                     | 373 (1), 817 (1), 839 (1)                                                                                                                                                  | 1                         | 1                         | 0                       |
| 35              | 2                 | 3 (1.8)                     | <b>374</b> (2), 818 (1)                                                                                                                                                    | 2                         | 4                         | 1 (33.3)                |
| 50              | 2                 | 3 (1.8)                     | 369 (2), <b>378</b> (1)                                                                                                                                                    | 2                         | 4                         | 1 (33.3)                |
| 6               | 2                 | 2 (1.2)                     | 149 (1), 835 (1)                                                                                                                                                           | 2.0                       | 2.0                       | 0                       |
| 14              | 2                 | 2 (1.2)                     | <b>587</b> (1), <b>846</b> (1)                                                                                                                                             | 4.0                       | 4.0                       | 2 (100)                 |
| 28              | 1                 | 2 (1.2)                     | 571 (2)                                                                                                                                                                    | 0.5                       | 2                         | 0                       |
| 40              | 1                 | 2 (1.2)                     | 187 (2)                                                                                                                                                                    | 1                         | 1                         | 0                       |
| 49              | 1                 | 2 (1.2)                     | 358 (3)                                                                                                                                                                    | 0.5                       | 0.5                       | 0                       |
| 5               | 1                 | 1 (0.6)                     | <b>394</b> (1)                                                                                                                                                             | 4                         | NA                        | 1 (100)                 |
| 25              | 1                 | 1 (0.6)                     | <b>525</b> (1)                                                                                                                                                             | 4                         | NA                        | 1 (100)                 |
| 34              | 1                 | 1 (0.6)                     | 564 (1)                                                                                                                                                                    | 2                         | NA                        | 0                       |
| 47              | 1                 | 1 (0.6)                     | <b>370</b> (1)                                                                                                                                                             | 128                       | NA                        | 1 (100)                 |
| 58              | 1                 | 1 (0.6)                     | <b>164</b> (1)                                                                                                                                                             | 8                         | NA                        | 1 (100)                 |
| 62              | 1                 | 1 (0.6)                     | 165 (1)                                                                                                                                                                    | 2                         | NA                        | 0                       |
| 63              | 1                 | 1 (0.6)                     | 172 (1)                                                                                                                                                                    | 0.5                       | NA                        | 0                       |

\*The order of diploid sequence types in each clonal complex are listed by numbers of isolates per DST; DST numbers are given from lowest to highest. DST numbers with bold indicate fluconazole nonsusceptibility, but a DST can contain both fluconazole nonsusceptible (FNS) and fluconazole susceptible (FS) isolates. CC, clonal complex; DST, diploid sequence type; MIC<sub>50</sub>, minimum inhibitory concentration encompassing 50% of isolates; MIC<sub>90</sub>, minimum inhibitory concentration encompassing 90% of isolates; NA, not applicable.

†For CCs with <5 isolates, minimum inhibitory concentration 50 (MIC<sub>50</sub>) is replaced by minimum MIC and MIC<sub>90</sub> is replaced with maximum MIC. For isolates with only 1 CC, MIC<sub>50</sub> is replaced with exact MIC and MIC<sub>90</sub> is not applicable.

**Appendix Table 2.** Summary of the year and location in which selected genotypes of *Candida tropicalis* clinical and environment isolates from clonal complex 3, 10, and 11 were reported\*

| Clonal complex | DST  | Year            | Location             | Source    | Isolate number                                                                                                   | Fluconazole MIC (µg/mL) | References    |
|----------------|------|-----------------|----------------------|-----------|------------------------------------------------------------------------------------------------------------------|-------------------------|---------------|
| 3              | 225  | 2012–2016       | Taiwan, NTUH         | C         | F2012i031, F2013 g040, F2014 g069, F2015f002, F2015f066, F2016a011, F2016a073, F2016d089, F2016e086              | 32–512                  | This study    |
|                |      | 2012            | Taiwan, Others       | E         | F85                                                                                                              | 4                       | 4             |
|                |      | NA              | Taiwan, Others       | C         | –                                                                                                                | –                       | 4             |
|                |      | 2014–2015       | Beijing, China       | C         | Ct01R, Ct07R, Ct08R, Ct09R                                                                                       | 64–>256                 | 5             |
|                | 287  | 2010            | Beijing, China       | C         | BZR-62                                                                                                           | –                       | 1             |
|                | 294  | 2011            | Beijing, China       | C         | BZR-71                                                                                                           | –                       | 1             |
|                | 330  | 2009, 2010      | Chengdu, China       | C         | 09HX010, 10HX073                                                                                                 | –                       | 1             |
|                |      | N/A             | Hainan, China        | C         | DZ29_hn_m_8_Pt                                                                                                   | –                       | 1             |
|                |      | 2011, 2014      | Shenzhen, China      | C         | F20, E616                                                                                                        | –                       | 1             |
|                | 333  | 2014, 2017      | Taiwan, NTUH         | C         | F2014e092, F2017f024                                                                                             | 1                       | This study    |
|                |      | 2010            | Chengdu, China       | C         | 10HX030                                                                                                          | –                       | 1             |
|                |      | N/A             | Hainan, China        | –         | DFR39_hn_m_8_Pt                                                                                                  | –                       | 1             |
|                |      | 2006, 2011      | Shenzhen, China      | C         | G213, E446                                                                                                       | –                       | 1             |
|                |      | 2015–2017       | Italy                | C         | IRCCS-3, IRCCS-40, IRCCS-42, IRCCS-43, B4BR3, ALOG1                                                              | <1                      | 6             |
|                | 375  | 2013            | Taiwan, NTUH         | C         | F2013a028                                                                                                        | –                       | This study, 1 |
|                | 376  | 2013–2017       | Taiwan, NTUH         | C         | F2012f046, F2012f083, F2013a013, F2015c056, F2017c014, F2017c078                                                 | 64–512                  | This study, 1 |
|                |      | 2012–2015       | Shanghai, China      | C         | RC51, RC165, RC181, RC193, RC289, RC366, RC519, RC527                                                            | 16–168                  | 2             |
|                | 379  | 2011            | Taiwan, NTUH         | C         | F2011ah028                                                                                                       | 1                       | This study, 1 |
|                | 411  | 2010            | Beijing, China       | C         | ZRCT27                                                                                                           | –                       | 1             |
|                | 426  | 2012            | Gwangju, South Korea | C         | BS48                                                                                                             | –                       | 1             |
|                |      | 2008            | Shenzhen, China      | C         | 8559                                                                                                             | –                       | 1             |
|                | 449  | 2016            | Hainan, China        | C         | SYL5 2 14 hn f 65 Pt                                                                                             | –                       | 1             |
|                | 505  | 2017            | Taiwan, NTUH         | C         | F2017e079                                                                                                        | 512                     | This study    |
|                |      | 2012            | Shanghai, China      | C         | 572                                                                                                              | 64                      | 1,2           |
|                | 506  | 2014–2015       | Taiwan, NTUH         | C         | F2014f079, F2014 g052, F2015a060, F2015d058, F2015e040, F2015e098                                                | 256–512                 | This study    |
|                |      | 2014            | Taiwan, Others       | C         | YM140066                                                                                                         | 64                      | 1             |
|                |      | 2013            | Shanghai, China      | C         | 573                                                                                                              | 64                      | 1,2           |
|                |      | 2015            | Beijing, China       | C         | Ct10R                                                                                                            | >256                    | 5             |
|                | 507  | 2013–2017       | Taiwan, NTUH         | C         | F2013h050, F2015a021, F2015d026, F2016a057–2, F2017b087, F2017d061, F2017e044, F2017f090, F2017 g013, F2017 g048 | 128–512                 | This study    |
|                |      | 2013–2015       | Shanghai, China      | C         | 574, 575, 576, 577, 578, 579, 580, 581, 582, 583, 584, 585, 586                                                  | 32–128                  | 1,2           |
|                | 532  | 2014            | Shanghai, China      | C         | 618                                                                                                              | 1                       | 1             |
|                |      | 2011, 2013      | Shenzhen, China      | C         | E303, T083                                                                                                       | –                       | 1             |
|                | 546  | 2014            | Taiwan, Others       | C         | F2014f003                                                                                                        | –                       | 1             |
| 590            | 2014 | Taiwan, Others  | C                    | YM140663  | 32                                                                                                               | 1                       |               |
| 592            | 2012 | Taiwan, Others  | –                    | YFA123445 | 64                                                                                                               | 1                       |               |
| 593            | 2014 | Taiwan, Others  | C                    | YM140586  | 64                                                                                                               | 1                       |               |
| 594            | 2014 | Taiwan, Others  | C                    | YM140285  | 64                                                                                                               | 1                       |               |
| 595            | 2014 | Taiwan, Others  | C                    | YM140907  | 4                                                                                                                | 1                       |               |
| 596            | 2012 | Taiwan, Others  | –                    | YFA121135 | 4                                                                                                                | 1                       |               |
| 599            | 2014 | Taiwan, Others  | –                    | YM140982  | 4                                                                                                                | 1                       |               |
| 600            | 2014 | Taiwan, Others  | C                    | YM140789  | 4                                                                                                                | 1                       |               |
| 724            | 2008 | Shenzhen, China | C                    | 8152      | –                                                                                                                | 1                       |               |

| Clonal complex | DST | Year      | Location        | Source | Isolate number                  | Fluconazole MIC (µg/mL) | References    |
|----------------|-----|-----------|-----------------|--------|---------------------------------|-------------------------|---------------|
|                | 753 | 2012      | Taiwan, NTUH    | C      | F2012d069                       | 64                      | This study    |
|                | 754 | 2013      | Taiwan, NTUH    | C      | F2013e089                       | 256                     | This study    |
|                | 838 | 2017      | Taiwan, NTUH    | C      | F2017f039                       | 256                     | This study, 1 |
|                | 847 | 2017      | Taiwan, NTUH    | C      | F2017_g035                      | 2                       | This study    |
|                | 849 | 2013      | Taiwan, Others  | –      | CT105                           | 64                      | 1             |
|                | 855 | 2012      | Taiwan, Others  | –      | CT261                           | 128                     | 1             |
| 10             | 499 | 2014      | Singapore       | C      | K2, 624                         | >256                    | 1,3           |
|                | 536 | 2014      | Singapore       | C      | 623                             | >256                    | 1,3           |
|                | 537 | 2014      | Singapore       | C      | 625                             | 64                      | 1,3           |
|                | 538 | 2014      | Singapore       | C      | 626                             | >256                    | 1,3           |
|                | 539 | 2014      | Singapore       | C      | 627                             | 256                     | 1,3           |
|                | 540 | 2014      | Singapore       | C      | 628                             | >256                    | 1,3           |
|                | 541 | 2014      | Singapore       | C      | 629                             | 96                      | 1,3           |
|                | 542 | 2014      | Singapore       | C      | 630                             | >256                    | 1,3           |
|                | 543 | 2014      | Singapore       | C      | 631                             | >256                    | 1,3           |
|                | 544 | 2014      | Singapore       | C      | 632                             | >256                    | 1,3           |
|                | 545 | 2014      | Singapore       | C      | 633                             | 0.25                    | 1,3           |
|                | 605 | 2016      | Nanchang, China | C      | 9238                            | 4                       | 1             |
|                | 608 | 2016      | Nanchang, China | C      | 12070                           | 64                      | 1             |
| 11             | 335 | 2010      | Chengdu, China  | C      | 10HX044                         | –                       | 1             |
|                | 508 | 2014–2017 | Taiwan, NTUH    | C      | F2014f021, F2015c031, F2017b083 | 16–32                   | This study    |
|                |     | 2013–2015 | Shanghai, China | C      | 587, 588, 589                   | 8–16                    | 1,2           |
|                |     | 2014      | Shenzhen, China | –      | F291                            | –                       | 1             |
|                |     | 2015      | Beijing, China  | C      | Ct11R, Ct12R                    | 64                      | 5             |
|                | 521 | 2014      | Shanghai, China | C      | 605                             | 1                       | 1             |
|                | 535 | 2015      | Singapore       | C      | 622                             | >256                    | 1,3           |
|                | 606 | 2016      | Nanchang, China | C      | 10307, 10285, 10471             | 4–8                     | 1             |
|                | 609 | 2016      | Nanchang, China | C      | 10787–2, 12127, 10787–1         | 8                       | 1             |
|                | 610 | 2016      | Nanchang, China | C      | 10215                           | 2                       | 1             |
|                | 752 | 2014      | Taiwan, NTUH    | C      | F2014d080                       | 32                      | This study    |
|                | 843 | 2012      | Taiwan, Others  | C      | C2–1010802                      | –                       | 1             |
|                | 851 | 2014      | Taiwan, Others  | –      | CT152                           | 16                      | 1             |

\*Only fluconazole nonsusceptible isolates obtained from the *Candida tropicalis* multilocus sequence typing (MLST) central database (<https://pubmlst.org/ctropicalis>) were added to 165 blood isolates in the current cohort for phylogenetic analyses in Figure 2 panels A and B. All MLST numbers are from the MLST database. C, clinical; CC, clonal complex; DST, diploid sequence type; E, environmental; FLC, fluconazole; MIC, minimum inhibitory concentration; NTUH, National Taiwan University Hospital; –, not available.

**Appendix Table 3.** Characteristics and underlying conditions of patients with fluconazole-susceptible and fluconazole-nonsusceptible *Candida tropicalis* bloodstream infections, Taiwan, 2011–2017\*

| Characteristic                              | Total, n = 344   | With FS <i>C. tropicalis</i><br>BSIs, n = 286 | With FNS <i>C. tropicalis</i><br>BSIs, n = 58 | p value |
|---------------------------------------------|------------------|-----------------------------------------------|-----------------------------------------------|---------|
| <b>Demographics</b>                         |                  |                                               |                                               |         |
| Age, y, median (IQR)                        | 62.8 (53.2–73.5) | 62.4 (53.0–74.3)                              | 63.4 (55.2–72.1)                              | 0.85    |
| Sex, no. (%)                                |                  |                                               |                                               | 0.54    |
| M                                           | 201 (58.4)       | 165 (57.7)                                    | 36 (62.1)                                     |         |
| F                                           | 143 (41.6)       | 121 (42.3)                                    | 22 (37.9)                                     |         |
| <b>Underlying conditions</b>                |                  |                                               |                                               |         |
| Charlson comorbidity index, median (IQR)    | 4.0 (2.0–6.0)    | 3.5 (2.0–6.0)                                 | 4.0 (2.0–7.0)                                 | 0.95    |
| Condition, no. (%)                          |                  |                                               |                                               |         |
| Myocardial infarction                       | 37 (10.8)        | 30 (10.5)                                     | 7 (12.1)                                      | 0.65    |
| Congestive heart failure                    | 29 (8.4)         | 25 (8.7)                                      | 4 (6.9)                                       | 0.80    |
| Peripheral occlusive arterial disease       | 1 (0.3)          | 1 (0.3)                                       | 0                                             | 0.99    |
| Cerebrovascular diseases                    | 24 (7.0)         | 20 (7.0)                                      | 4 (6.9)                                       | 0.99    |
| Hemiplegia                                  | 5 (1.5)          | 4 (1.4)                                       | 1 (1.7)                                       | 0.99    |
| Dementia                                    | 7 (2.0)          | 7 (2.4)                                       | 0                                             | 0.61    |
| Chronic pulmonary disease                   | 17 (4.9)         | 15 (5.2)                                      | 2 (3.4)                                       | 0.75    |
| Connective tissue disease                   | 16 (4.7)         | 14 (4.9)                                      | 2 (3.4)                                       | 0.99    |
| Peptic ulcer disease                        | 33 (9.6)         | 28 (9.8)                                      | 5 (8.6)                                       | 0.99    |
| Mild liver disease                          | 51 (14.8)        | 45 (15.7)                                     | 6 (10.3)                                      | 0.42    |
| Liver disease (moderate–severe)             | 19 (5.5)         | 13 (4.6)                                      | 6 (10.3)                                      | 0.11    |
| Renal diseases (moderate–severe)            | 101 (29.4)       | 83 (29.0)                                     | 13 (28.3)                                     | 0.76    |
| Diabetes mellitus without end organ damage  | 76 (22.1)        | 60 (21.0)                                     | 16 (27.6)                                     | 0.27    |
| Diabetes mellitus with end organ damage     | 3 (0.9)          | 3 (1.1)                                       | 0                                             | 0.99    |
| Solid tumor without metastases              | 95 (27.6)        | 79 (27.6)                                     | 16 (27.6)                                     | 0.99    |
| Metastatic solid tumor                      | 83 (24.1)        | 72 (25.2)                                     | 11 (19.0)                                     | 0.31    |
| Hematological malignancy                    |                  |                                               |                                               |         |
| Leukemia                                    | 51 (14.8)        | 38 (13.3)                                     | 13 (22.4)                                     | 0.07    |
| Lymphoma                                    | 21 (6.1)         | 18 (6.3)                                      | 3 (5.2)                                       | 0.99    |
| AIDS                                        | 2 (0.6)          | 1 (0.4)                                       | 1 (1.7)                                       | 0.31    |
| <b>Primary focus of infection, no. (%)</b>  |                  |                                               |                                               |         |
| Catheter-related bloodstream infection      | 129 (37.5)       | 111 (38.8)                                    | 18 (31.0)                                     | 0.27    |
| Primary fungemia                            | 145 (42.2)       | 122 (42.7)                                    | 23 (39.7)                                     | 0.67    |
| Urinary tract infection                     | 64 (18.6)        | 51 (17.8)                                     | 13 (22.4)                                     | 0.41    |
| Intraabdominal infection                    | 12 (3.5)         | 10 (3.5)                                      | 2 (3.5)                                       | 0.99    |
| <b>Microbiological characteristics</b>      |                  |                                               |                                               |         |
| Time to positivity, d, median (IQR)         | 18.5 (12.7–22.2) | 18.5 (12.7–22.4)                              | 18.8 (13.8–21.5)                              | 0.76    |
| Recent <i>Candida</i> colonization, no. (%) | 149 (43.3)       | 126 (44.1)                                    | 23 (39.7)                                     | 0.54    |
| Concomitant bacteremia, no. (%)             | 67 (19.5)        | 60 (21.0)                                     | 7 (12.1)                                      | 0.15    |
| <b>Other outcome variables, no. (%)</b>     |                  |                                               |                                               |         |
| Deep-seated infections                      | 22 (6.4)         | 18 (6.3)                                      | 4 (6.9)                                       | 0.77    |
| LOS after candidemia onset, d; median (IQR) | 21.5 (8.0–39.0)  | 21.0 (8.0–38.0)                               | 22.5 (10.0–46.0)                              | 0.42    |
| Duration of persistence, d; mean $\pm$ SD   | 3.8 $\pm$ 6.5    | 3.7 $\pm$ 6.2                                 | 4.4 $\pm$ 7.8                                 | 0.46    |

\*BSIs, bloodstream infections; FNS, fluconazole nonsusceptible; FS, fluconazole susceptible; IQR, interquartile range; LOS, length of stay.

**Appendix Table 4.** Comparisons of clinical and microbiological characteristics among patients with candidemia infected by fluconazole-susceptible *Candida tropicalis* isolates, fluconazole-nonsusceptible isolates belonging to clonal complex 3 (CC3) and other CCs\*

| Characteristic                                  | With FNS CC3<br><i>C. tropicalis</i> BSIs<br>(n = 36) | With FNS other CCs<br><i>C. tropicalis</i> BSIs<br>FNS (n = 19) | With FS<br><i>C. tropicalis</i> BSIs<br>(n = 110) | p value               |
|-------------------------------------------------|-------------------------------------------------------|-----------------------------------------------------------------|---------------------------------------------------|-----------------------|
| <b>Demographics</b>                             |                                                       |                                                                 |                                                   |                       |
| Age, y; median (IQR)                            | 61.7 (56.3–68.4)                                      | 66.7 (54.5–74.7)                                                | 65.2 (53.8–75.0)                                  | 0.60                  |
| Sex, no. (%)                                    |                                                       |                                                                 |                                                   | 0.61                  |
| M                                               | 23 (63.9)                                             | 12 (63.2)                                                       | 61 (55.5)                                         |                       |
| F                                               | 13 (36.1)                                             | 7 (36.8)                                                        | 49 (44.5)                                         |                       |
| <b>Comorbid conditions</b>                      |                                                       |                                                                 |                                                   |                       |
| Charlson comorbidity index, median (IQR)        | 4.5 (3.0–7.0)                                         | 2.0 (1.0–4.0)                                                   | 3.0 (2.0–6.0)                                     | <b>0.006†</b>         |
| Myocardial infarction                           | 1 (2.8)                                               | 5 (26.3)                                                        | 9 (8.2)                                           | <b>0.02†,‡</b>        |
| Congestive heart failure                        | 2 (5.6)                                               | 1 (5.3)                                                         | 8 (7.3)                                           | 0.99                  |
| Peripheral occlusive arterial disease           | 0                                                     | 0                                                               | 1 (0.9)                                           | 0.99                  |
| Cerebrovascular diseases                        | 3 (8.3)                                               | 1 (5.3)                                                         | 7 (6.4)                                           | 0.89                  |
| Hemiplegia                                      | 0                                                     | 1 (5.3)                                                         | 1 (0.9)                                           | 0.26                  |
| Dementia                                        | 0                                                     | 0                                                               | 4 (3.6)                                           | 0.74                  |
| Chronic pulmonary disease                       | 2 (5.6)                                               | 0                                                               | 7 (6.4)                                           | 0.76                  |
| Connective tissue disease                       | 1 (2.8)                                               | 1 (5.3)                                                         | 6 (5.5)                                           | 0.99                  |
| Peptic ulcer                                    | 4 (11.1)                                              | 1 (5.3)                                                         | 12 (10.9)                                         | 0.86                  |
| Liver disease, mild                             | 6 (16.7)                                              | 0                                                               | 10 (9.1)                                          | 0.12                  |
| Liver disease, moderate–severe                  | 4 (11.1)                                              | 2 (10.5)                                                        | 5 (4.6)                                           | 0.23                  |
| Renal disease, moderate–severe                  | 12 (33.3)                                             | 4 (21.1)                                                        | 39 (35.5)                                         | 0.53                  |
| Diabetes mellitus without end organ damage      | 11 (30.6)                                             | 5 (26.3)                                                        | 24 (21.8)                                         | 0.55                  |
| Diabetes mellitus with end organ damage         | 0                                                     | 0                                                               | 1 (0.9)                                           | 0.99                  |
| Solid tumor without metastases                  | 9 (25.0)                                              | 5 (26.3)                                                        | 26 (23.6)                                         | 0.96                  |
| Metastatic solid tumor                          | 10 (27.8)                                             | 1 (5.3)                                                         | 28 (25.5)                                         | 0.11                  |
| Leukemia                                        | 10 (27.8)                                             | 3 (15.8)                                                        | 17 (15.5)                                         | 0.25                  |
| Lymphoma                                        | 3 (8.3)                                               | 0                                                               | 5 (4.1)                                           | 0.53                  |
| Acquired immunodeficiency syndrome              | 1 (2.8)                                               | 0                                                               | 1 (0.9)                                           | 0.56                  |
| <b>Healthcare factors, no. (%)§</b>             |                                                       |                                                                 |                                                   |                       |
| Solid organ transplant                          | 1 (2.9)                                               | 0                                                               | 1 (0.9)                                           | 0.55                  |
| Hematopoietic stem cell transplant              | 1 (2.9)                                               | 0                                                               | 4 (3.6)                                           | 0.99                  |
| Major surgery                                   | 2 (5.6)                                               | 3 (15.8)                                                        | 13 (11.8)                                         | 0.47                  |
| Parenteral hyperalimentation                    | 24 (66.7)                                             | 9 (47.4)                                                        | 59 (53.6)                                         | 0.29                  |
| Steroid use                                     | 26 (72.2)                                             | 11 (57.9)                                                       | 36 (32.7)                                         | <b>&lt;0.001¶</b>     |
| Chemotherapy                                    | 24 (66.7)                                             | 5 (26.3)                                                        | 46 (41.8)                                         | <b>0.007†,¶</b>       |
| Neutropenia                                     | 15 (42.9)                                             | 6 (31.6)                                                        | 23 (21.5)                                         | <b>0.050</b>          |
| Mechanical ventilator                           | 9 (25.0)                                              | 6 (31.6)                                                        | 30 (27.3)                                         | 0.90                  |
| Indwelling urinary catheter                     | 18 (50.0)                                             | 9 (47.4)                                                        | 38 (34.6)                                         | 0.20                  |
| Central venous catheter                         | 30 (83.3)                                             | 15 (79.0)                                                       | 96 (87.3)                                         | 0.50                  |
| Antifungal drug exposure                        | 24 (66.7)                                             | 2 (10.5)                                                        | 13 (11.8)                                         | <b>&lt;0.001†,¶</b>   |
| Antimicrobial drug exposure                     | 35 (97.2)                                             | 15 (79.0)                                                       | 96 (87.3)                                         | 0.07                  |
| <b>Disease severity</b>                         |                                                       |                                                                 |                                                   |                       |
| ICU onset, no. (%)                              | 11 (30.6)                                             | 8 (42.1)                                                        | 33 (30.0)                                         | 0.58                  |
| APACHE II score, median (IQR)                   | 19.5 (16.0–26.0)                                      | 17.0 (14.0–23.0)                                                | 19.0 (16.0–26.0)                                  | 0.59                  |
| <b>Primary focus of infection, no. (%)</b>      |                                                       |                                                                 |                                                   |                       |
| Catheter-related bloodstream infection          | 11 (30.6)                                             | 7 (36.8)                                                        | 51 (46.4)                                         | 0.22                  |
| Primary fungemia                                | 10 (27.8)                                             | 10 (52.6)                                                       | 38 (34.5)                                         | 0.19                  |
| Urinary tract infection                         | 10 (27.8)                                             | 3 (15.8)                                                        | 23 (20.9)                                         | 0.60                  |
| Intraabdominal infection                        | 2 (5.6)                                               | 0                                                               | 4 (3.6)                                           | 0.67                  |
| <b>Microbiological characteristics, no. (%)</b> |                                                       |                                                                 |                                                   |                       |
| Time to positivity, d; median (IQR)             | 17.7 (13.8–21.5)                                      | 19.0 (16.7–20.1)                                                | 16.8 (13.0–21.2)                                  | 0.47                  |
| Recent <i>Candida</i> colonization              | 18 (50.0)                                             | 5 (26.3)                                                        | 51 (46.4)                                         | 0.23                  |
| Concomitant bacteremia                          | 4 (11.1)                                              | 3 (15.8)                                                        | 23 (20.9)                                         | 0.43                  |
| <b>Therapeutic intervention, no. (%)#</b>       |                                                       |                                                                 |                                                   |                       |
| Early appropriate antifungal agents             | 17 (47.2)                                             | 1 (5.3)                                                         | 96 (87.3)                                         | <b>&lt;0.001†,‡,¶</b> |
| Fluconazole as the first antifungal agent       | 20 (55.6)                                             | 15 (79.0)                                                       | 75 (68.2)                                         | 0.20                  |
| Early removal of central venous catheter        | 17/30 (56.7)                                          | 11/15 (73.3)                                                    | 50/96 (52.1)                                      | 0.30                  |
| <b>Clinical outcomes, no. (%)</b>               |                                                       |                                                                 |                                                   |                       |
| Deep-seated infections                          | 3 (8.3)                                               | 1 (5.3)                                                         | 9 (8.2)                                           | 0.99                  |
| Death                                           |                                                       |                                                                 |                                                   |                       |
| 7 d                                             | 8 (22.2)                                              | 3 (15.8)                                                        | 15 (13.6)                                         | 0.46                  |
| 14 d                                            | 11 (30.6)                                             | 5 (26.3)                                                        | 32 (29.1)                                         | 0.99                  |
| 28 d                                            | 16 (44.4)                                             | 8 (42.1)                                                        | 51 (46.4)                                         | 0.94                  |
| In hospital                                     | 26 (72.2)                                             | 10 (52.6)                                                       | 71 (64.6)                                         | 0.34                  |
| LOS after candidemia onset, d; median (IQR)     | 25.5 (9.5–48.0)                                       | 20.0 (14.0–44.0)                                                | 23.0 (10.0–39.0)                                  | 0.96                  |

| Characteristic                              | With FNS CC3<br><i>C. tropicalis</i> BSIs<br>(n = 36) | With FNS other CCs<br><i>C. tropicalis</i> BSIs<br>FNS (n = 19) | With FS<br><i>C. tropicalis</i> BSIs<br>(n = 110) | p value     |
|---------------------------------------------|-------------------------------------------------------|-----------------------------------------------------------------|---------------------------------------------------|-------------|
| Microbiological outcomes                    |                                                       |                                                                 |                                                   |             |
| Persistence, no. (%)**                      | 11 (35.5)                                             | 4 (25.0)                                                        | 40 (40.4)                                         | 0.51        |
| Duration of persistence, d; mean <b>+SD</b> | <b>4.8 + 8.0</b>                                      | <b>3.5 + 7.7</b>                                                | <b>5.7 + 7.6</b>                                  | <b>0.53</b> |

\*Bold text indicates statistical significance for overall comparison. BSI, bloodstream infection; FNS, fluconazole nonsusceptible; FS, fluconazole susceptible; ICU, intensive care unit; IQR, interquartile range; LOS, length of stay; SD, standard deviation.

†Pairwise comparisons with Bonferroni corrections were conducted when overall p value  $\leq 0.05$ . p value of pairwise comparisons between fluconazole nonsusceptible clonal complex 3 and fluconazole nonsusceptible other clonal complexes  $< 0.05$  were listed.

‡Pairwise comparisons with Bonferroni corrections were conducted when overall p value  $\leq 0.05$ . p value of pairwise comparisons between fluconazole nonsusceptible other clonal complexes and fluconazole susceptible groups  $< 0.05$  were listed.

§Major surgery refers to cardiovascular or abdominal surgery. Classes of antifungal exposure azole or echinocandin, 31/3 in FS group vs. 24/2 in FNS group; of note, 14 (24.1%) patients in FNS group experienced breakthrough bloodstream infections compared with 18 (6.3%) patients in FS group ( $p < 0.001$ ).

¶ Pairwise comparisons with Bonferroni corrections were conducted when overall p value  $\leq 0.05$ . p value of pairwise comparisons between fluconazole nonsusceptible clonal complex 3 and fluconazole susceptible groups  $< 0.05$  were listed.

#Early adequate antifungal agents refers to administration of the recommended dose of an intravenous antifungal agent within 48 h after first positive blood culture collection for a susceptible *Candida* isolate, according to the Clinical and Laboratory Standards Institute (CLSI) species-specific breakpoints (7). Early removal of central venous catheters is defined as removal of all similar devices, including tunneled and peripherally inserted central catheters, within 48 h after obtaining the first positive blood culture.

\*\*Persistence is defined as  $> 5$  days of blood cultures positive for the same *Candida* species.

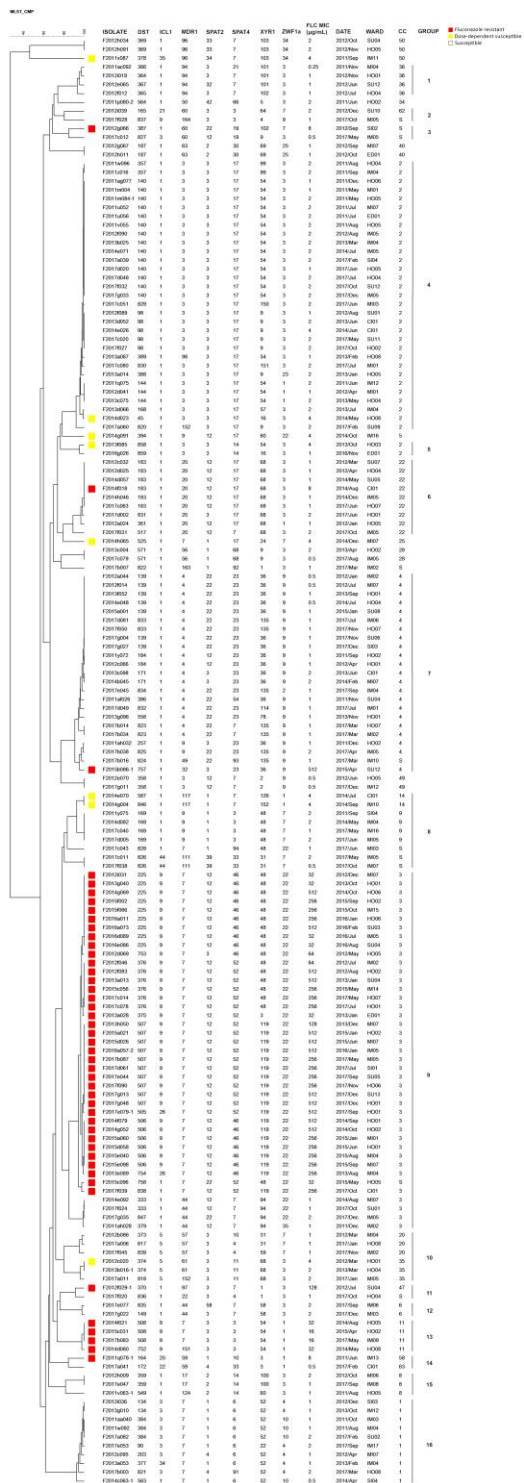

**Appendix Figure 1.** Dendrogram generated from multilocus sequence typing (MLST) data for 165 non-duplicate *Candida tropicalis* blood isolates, Taiwan, 2011–2017. Phylogenetic analysis by the unweighted pair group method with arithmetic averages. Strains with  $\geq 80\%$  similarity are indicated with colored bars and classified as fluconazole resistant (red), dose-dependent susceptible (yellow), or susceptible (white). Wards and number of isolates in ward group from which blood samples were collected are indicated; ED,

emergency department; HO, hemato-oncology; IM, internal medicine; MI, medical intensive care unit; SI, surgical intensive care unit; and SU, surgery. CC, clonal complex; DST, diploid sequence type; FLC, fluconazole. Scale bar indicates the percentage identity.



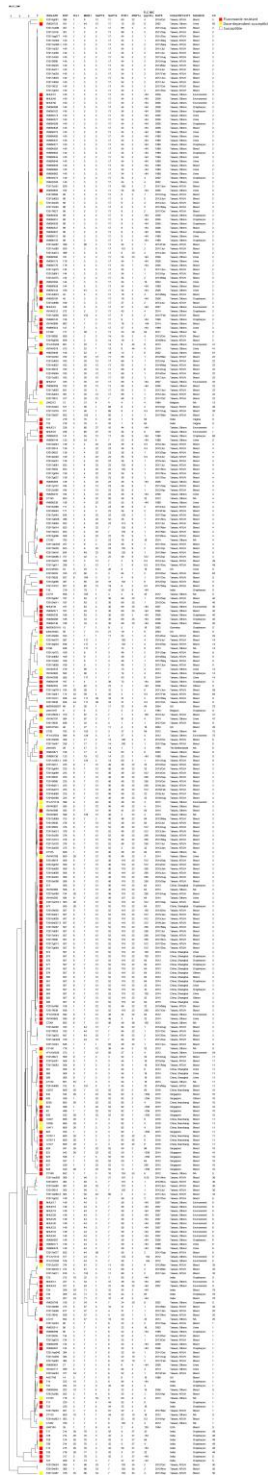

**Appendix Figure 2.** Dendrogram generated from multilocus sequence typing data for 350 non-duplicate *Candida tropicalis* clinical and environmental isolates. We conducted phylogenetic analysis by the unweighted pair group method with arithmetic averages. Isolates are indicated as fluconazole resistant (red), dose-dependent susceptible (yellow), and susceptible (white). CC, clonal complex; DST, diploid sequence type; FLC, fluconazole; NA, not available. Scale bar indicates the percentage identity.

## References

1. Jolly K. *Candida tropicalis* MLST central database sited at the University of Oxford.  
<https://pubmlst.org/ctropicalis>
2. Wang Y, Shi C, Liu JY, Li WJ, Zhao Y, Xiang MJ. Multilocus sequence typing of *Candida tropicalis* shows clonal cluster enrichment in azole-resistant isolates from patients in Shanghai, China. *Infect Genet Evol.* 2016;44:418–24. [PubMed https://doi.org/10.1016/j.meegid.2016.07.026](https://doi.org/10.1016/j.meegid.2016.07.026)
3. Chew KL, Cheng JWS, Jureen R, Lin RTP, Teo JWP. *ERG11* mutations are associated with high-level azole resistance in clinical *Candida tropicalis* isolates, a Singapore study. *Mycoscience.* 2017;58:111–5. <https://doi.org/10.1016/j.myc.2016.11.001>
4. Lo HJ, Tsai SH, Chu WL, Chen YZ, Zhou ZL, Chen HF, et al. Fruits as the vehicle of drug resistant pathogenic yeasts. *J Infect.* 2017;75:254–62. [PubMed https://doi.org/10.1016/j.jinf.2017.06.005](https://doi.org/10.1016/j.jinf.2017.06.005)
5. Jin L, Cao Z, Wang Q, Wang Y, Wang X, Chen H, et al. MDR1 overexpression combined with *ERG11* mutations induce high-level fluconazole resistance in *Candida tropicalis* clinical isolates. *BMC Infect Dis.* 2018;18:162. [PubMed https://doi.org/10.1186/s12879-018-3082-0](https://doi.org/10.1186/s12879-018-3082-0)
6. Scordino F, Giuffrè L, Barberi G, Marino Merlo F, Orlando MG, Giosa D, et al. Multilocus sequence typing reveals a new cluster of closely related *Candida tropicalis* genotypes in Italian patients with neurological disorders. *Front Microbiol.* 2018;9:679. [PubMed https://doi.org/10.3389/fmicb.2018.00679](https://doi.org/10.3389/fmicb.2018.00679)
7. Clinical and Laboratory Standards Institute. Reference method for broth dilution antifungal susceptibility testing of yeasts: Fourth Informational Supplement M27–S4. Wayne (PA): The Institute; 2012.
